# Supplementary material for: Platinum-decorated carbon nanotubes for hydrogen oxidation and proton reduction in solid acid electrochemical cells
Source: Royal Society of Chemistry journal article supplement (doi:10.1039/c4sc03003f), 2014-12-22
Supplement: c4sc03003f1.pdf [file c4sc03003f1.pdf]

Supplemental Information

Platinum-decorated Carbon Nanotubes for Hydrogen Oxidation and Proton Reduction in Solid Acid Electrochemical Cells

V. Sara Thoi<sup>a</sup>, Robert E. Usiskin<sup>a</sup>, and Sossina. M. Haile<sup>a</sup>

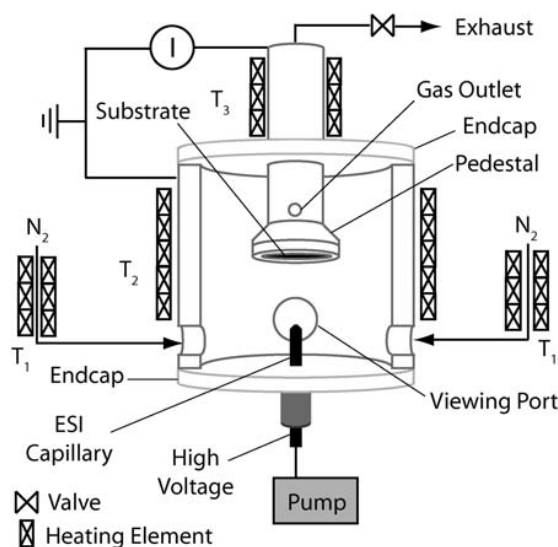

Figure S1. Schematic of the electro spray apparatus.<sup>1</sup>

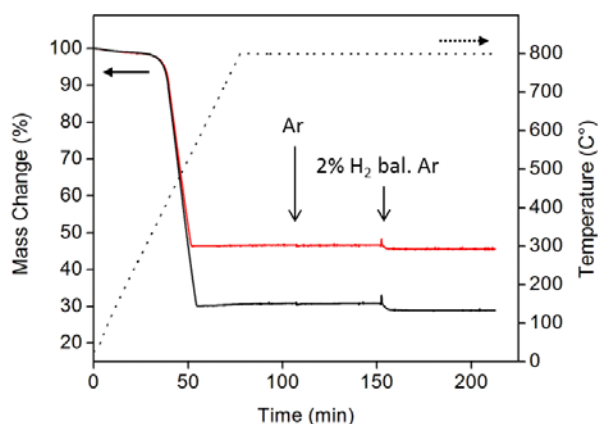

Figure S2. TGA profiles of 30 (red) and 46 wt% (black) Pt-CNTs under a flow of air, Ar, and 2.04% H<sub>2</sub> bal at 200 mL min<sup>-1</sup> and a heating rate of 10 °C min<sup>-1</sup>. The negligible mass change (< 1%) upon switched from oxidizing to reducing atmosphere indicates there is negligible formation of PtO<sub>x</sub>.

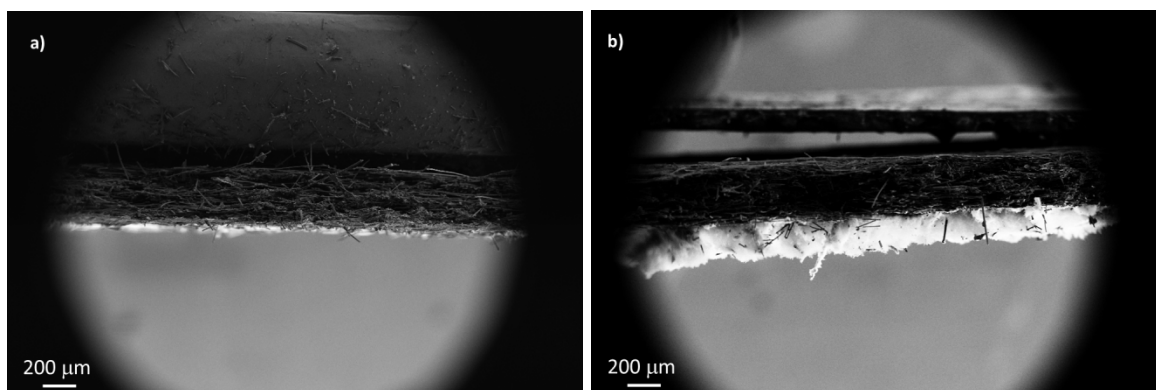

**Figure S3.** Cross-sectional SEM analysis of a) layered-composite and b) co-sprayed composite of 30 wt% Pt-CNT- $\text{CsH}_2\text{PO}_4$  from Strategies 1 and 2, respectively, illustrated in Scheme 2 in the main text. The straw-like layer is the carbon paper electrode and the thin white layer is the  $\text{CsH}_2\text{PO}_4$ -based electrode.

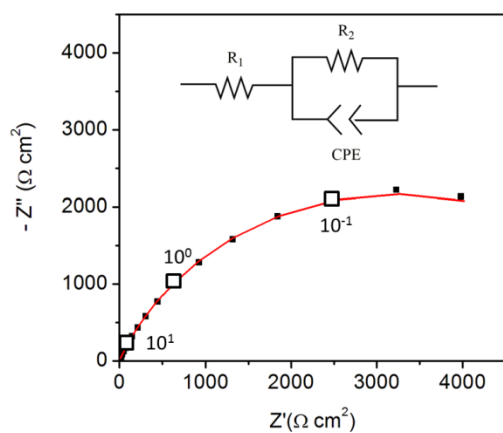

**Figure S4.** Symmetric cell impedance measurements of electrospayed commercial CNTs (as received). Measurements are performed at 240 °C in a dynamic atmosphere of 0.4 atm  $\text{H}_2\text{O}$  and balance  $\text{H}_2$  supplied at a gas velocity of  $6 \text{ cm min}^{-1}$  (inset: equivalent circuit used for fitting).

1. A. Varga, N. A. Brunelli, M. W. Louie, K. P. Giapis and S. M. Haile, *J. Mater. Chem.*, 2010, **20**, 6309.
